# Supplementary material for: Chemically induced topological zero mode at graphene armchair edges
Source: Royal Society of Chemistry journal article supplement (doi:10.1039/c6cp08352h), 2017-01-01
Supplement: c6cp08352h1.pdf [file c6cp08352h1.pdf]

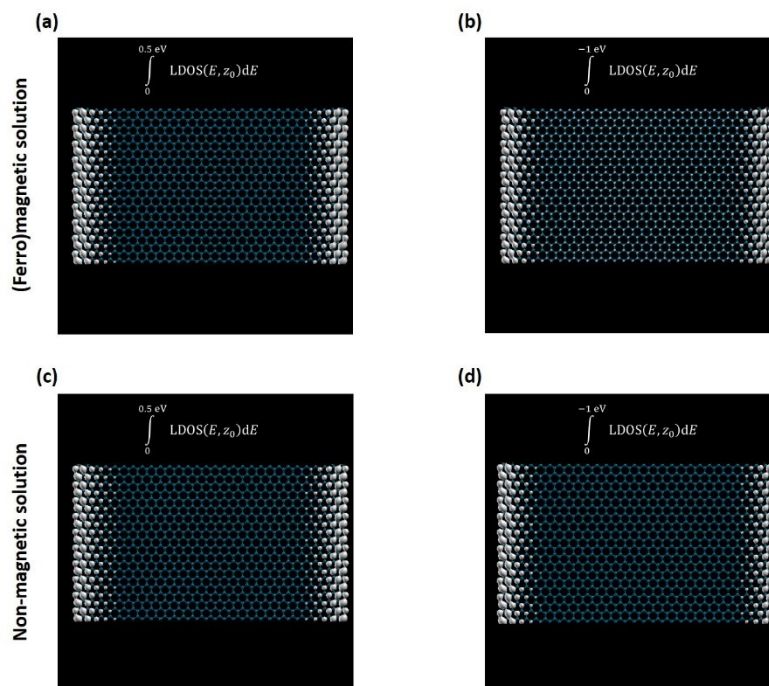

**Supplementary Figure 1.** Spatial distribution of (integrated) density of states for graphene ribbons with  $a_{21}$  type of the armchair edges. (a,b) Distribution of local density of states for ferromagnetic state; the integration is performed for states between Fermi level and 0.5 eV (a) and between Fermi level and -1.0 eV (b). (c,d) Same for the non-magnetic state.
